# Supplementary material for: Anti-thermal quenching of luminescence in Y2W3O12:Yb3+/RE3+ (RE = Er/Ho/Tm) and its temperature sensing application
Source: Royal Society of Chemistry journal article supplement (doi:10.1039/d3dt03331g), 2023-12-29
Supplement: d3dt03331g1.pdf [file d3dt03331g1.pdf]

## Supporting information

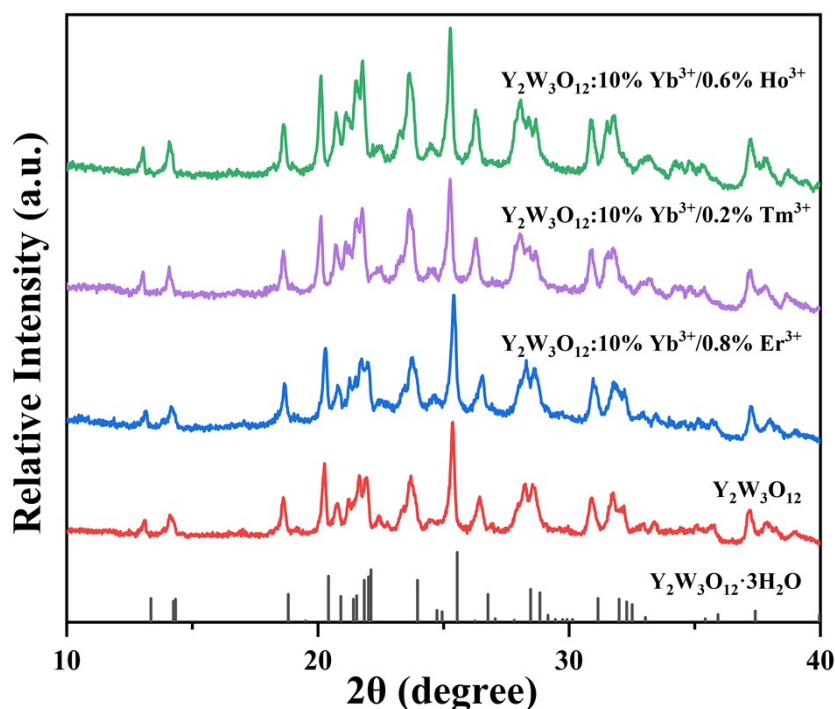

FS1 XRD of  $\text{Y}_2\text{W}_3\text{O}_{12} \cdot 3\text{H}_2\text{O}$ ,  $\text{Y}_2\text{W}_3\text{O}_{12}$  samples and

$\text{Y}_2\text{W}_3\text{O}_{12}:\text{RE}^{3+}(\text{RE}=0.8\%\text{Er}/0.6\%\text{Ho}/0.2\%\text{Tm})/10\%\text{Yb}^{3+}$  sample

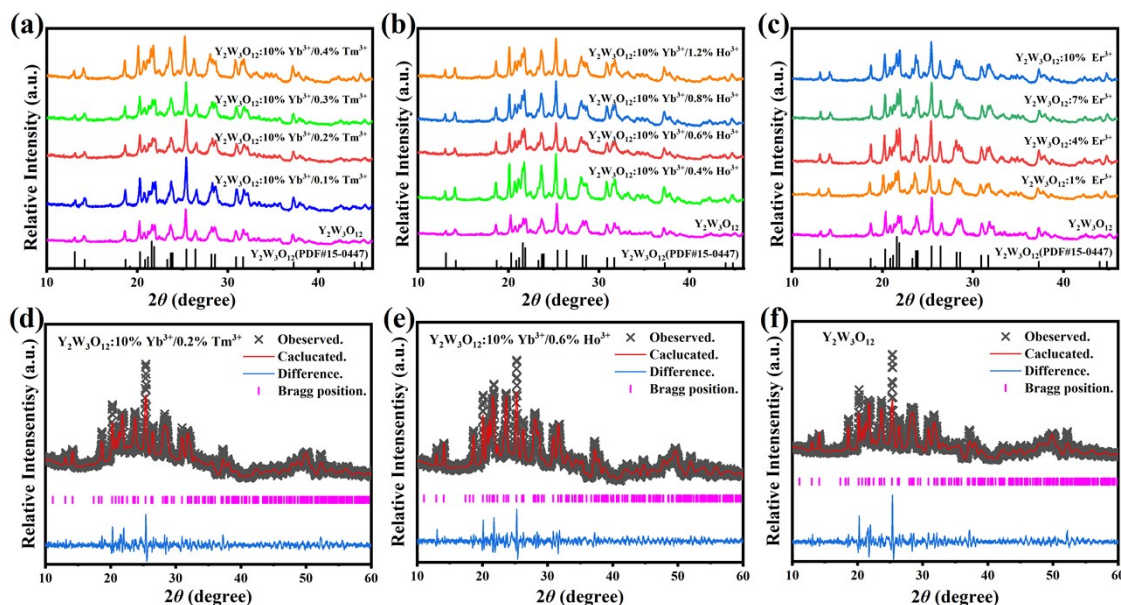

FS2 (a-c) XRD of  $\text{Y}_2\text{W}_3\text{O}_{12}:\text{x}\%\text{RE}^{3+}(\text{RE}=\text{Tm}/\text{Ho})/10\%\text{Yb}^{3+}$  samples and  $\text{Y}_2\text{W}_3\text{O}_{12}:\text{x}\%\text{Er}$  samples. (d-f) Rietveld plots of  $\text{Y}_2\text{W}_3\text{O}_{12}:\text{x}\%\text{RE}^{3+}(\text{RE}=\text{Tm}/\text{Ho})/10\%\text{Yb}^{3+}$  samples and  $\text{Y}_2\text{W}_3\text{O}_{12}$  samples.

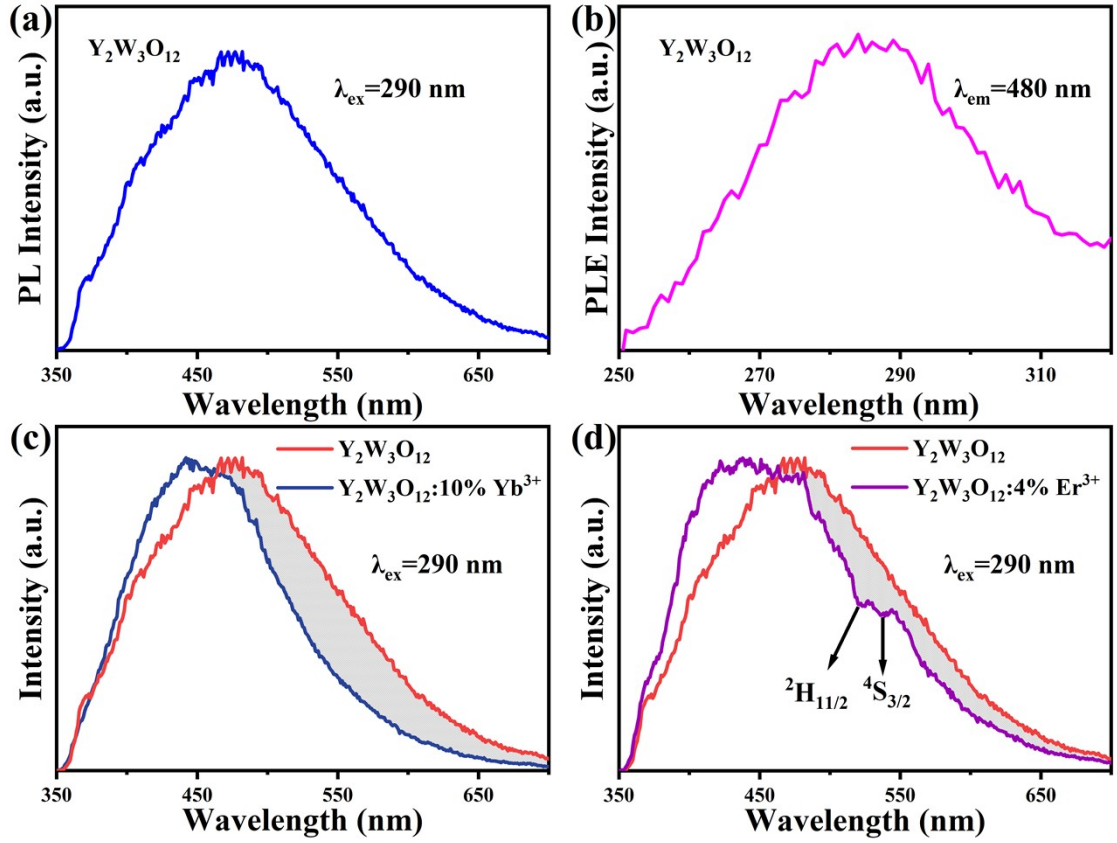

FS3 (a) PL spectra of  $\text{Y}_2\text{W}_3\text{O}_{12}$ . (b) PLE spectra of  $\text{Y}_2\text{W}_3\text{O}_{12}$ . (c)  $\text{Y}_2\text{W}_3\text{O}_{12}$  versus  $\text{Y}_2\text{W}_3\text{O}_{12}:\text{Yb}$  and (d)  $\text{Y}_2\text{W}_3\text{O}_{12}$  versus  $\text{Y}_2\text{W}_3\text{O}_{12}:\text{Er}$ , which confirms  $\text{WO}_4^{2-} \rightarrow \text{Yb}^{3+}$  and  $\text{WO}_4^{2-} \rightarrow \text{Er}^{3+}$  energy transfer, respectively.

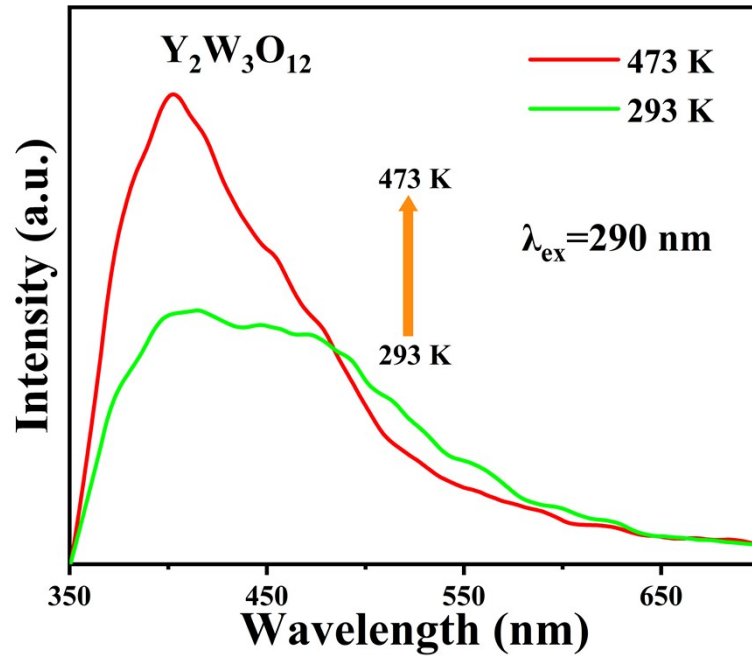

FS4 PL spectra of  $\text{Y}_2\text{W}_3\text{O}_{12}$  at different temperatures.
